# Supplementary material
Source: PubMed Central journal article supplement (PMC6663881)
Supplement: supp_RA119.007367_142871_2_supp_339350_ps9qcc.pdf [file supp_RA119.007367_142871_2_supp_339350_ps9qcc.pdf]

A

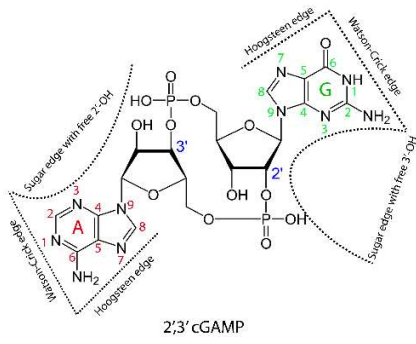

B

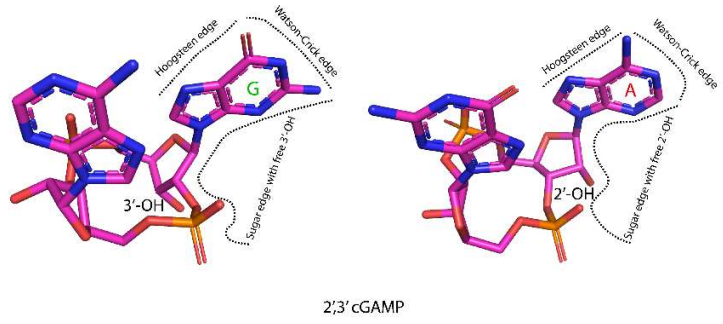

Supplementary figure 1. The sketch of interaction edges of 2',3' cGAMP.

## The "direct" motif

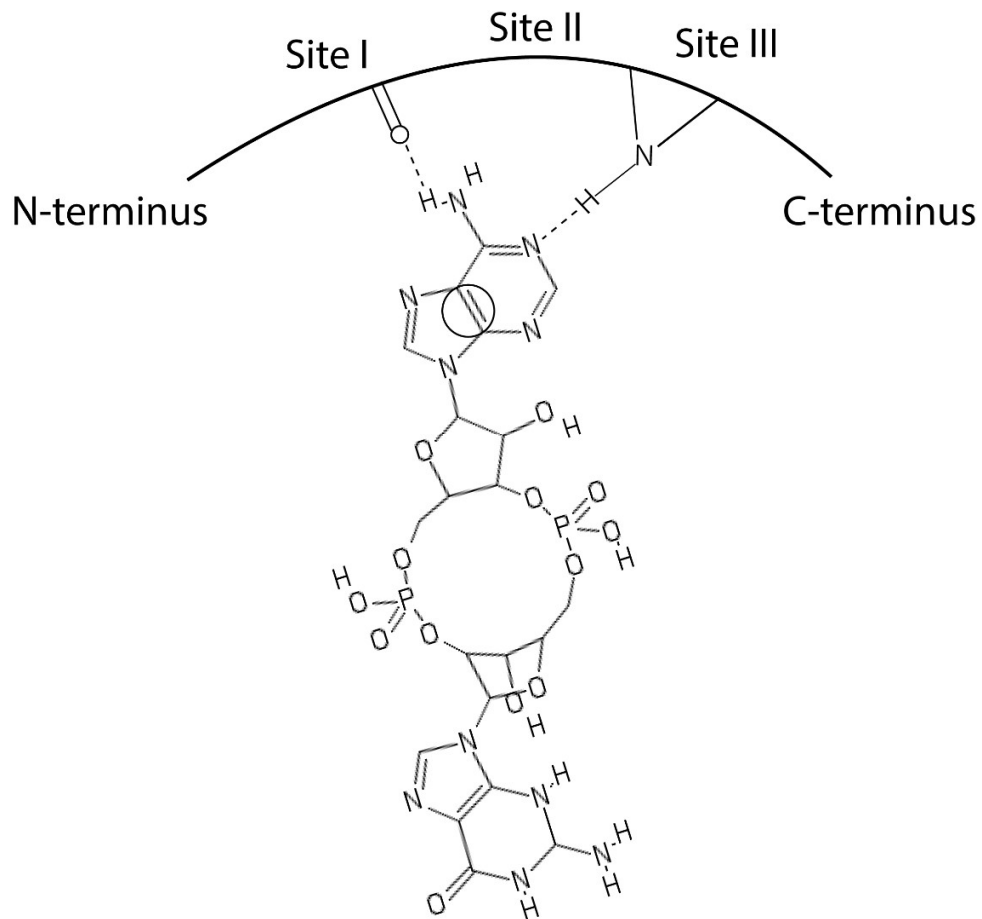

Supplementary figure 2. Sketch of the "direct" (Site I at the N-terminus and site II at the C-terminus of the recognition loop) adenine-binding motif. The adenine moiety is recognized by the adenine binding loop with two hydrogen bonds and stacks with one hydrophobic residue (black circle).

**Supplementary table 1. Interactions between porcine STING<sup>CBD</sup> and CDNs**

|                                                                | 2',3'<br>cGAMP(6A06) | c-di-<br>GMP(6A04) | 3',3'<br>cGAMP(6A05) | c-di-AMP<br>(6IYF) | c-di-<br>AMP(6A03) |
|----------------------------------------------------------------|----------------------|--------------------|----------------------|--------------------|--------------------|
| <b>Hydrogen bonds(<math>\leq 3.2</math> Å)</b>                 |                      |                    |                      |                    |                    |
| R238(NH2)                                                      | N7 (Guanine)         | N7 (Guanine)       | N7 (Guanine)         | N7 (Adenine)       |                    |
| R238'(NH2)                                                     | N7 (Adenine)         |                    |                      |                    |                    |
| T263(OG1)                                                      | N3 (Guanine)         | N3 (Guanine)       |                      |                    |                    |
| T263(OG1)                                                      | NH2(N2,Guanine)      | 3' hydroxyl        | 3' hydroxyl          | 3' hydroxyl        |                    |
| V239'(carbonyl)                                                | NH2(N6, Adenine)     |                    | NH2(N6, adenine)     | NH2(N6, adenine)   |                    |
| R238'(NH1)                                                     | O19(phosphate)       | O21(phosphate)     | OAI(phosphate)       | O2P(phosphate)     |                    |
| R238'(NH2)                                                     | O19(phosphate)       | O21(phosphate)     |                      |                    |                    |
| R238(NH1)                                                      | O29(phosphate)       | O2(phosphate)      | OAH(phosphate)       | O2P1(phosphate)    | O2P1(phosphate)    |
| R238(NH2)                                                      | O29(phosphate)       |                    |                      | O2P1(phosphate)    |                    |
| S162(OG)                                                       |                      |                    |                      |                    | O5(phosphate)      |
| S162'(OG)                                                      |                      |                    |                      |                    | O1P(phosphate)     |
| <b>Water-mediated Hydrogen bonds (<math>\leq 3.2</math> Å)</b> | 11                   | 9                  | 6                    | 8                  | 7                  |
| <b>Charge-charge interaction</b>                               | 2                    | 2                  | 2                    | 2                  | 2                  |
| <b>Stacking</b>                                                | 6                    | 6                  | 6                    | 6                  | 6                  |
| <b>Bad contact (bumps) (<math>\leq 3.2</math> Å)</b>           |                      |                    |                      |                    |                    |
| V239'(carbonyl)                                                |                      | O(C6, Guanine)     |                      |                    |                    |
| Y240'(CD1)                                                     |                      | O6 (Guanine)       |                      |                    | NH2(N6,adenine)    |
| Y240'(CE1)                                                     |                      | N7(Guanine)        | NH2(N6,adenine)      |                    |                    |
| Y240(CD1)                                                      |                      |                    |                      |                    | NH2(N6, adenine)   |
| Y167(CE1)                                                      |                      | N3(Guanine)        |                      |                    |                    |
| I235(CG1)                                                      |                      | NH2(N2, Guanine)   |                      |                    |                    |

|           |  |             |             |             |             |
|-----------|--|-------------|-------------|-------------|-------------|
| T263(OG1) |  |             |             | C2 (ribose) |             |
| T263'(CB) |  | 3' hydroxyl | 3' hydroxyl |             |             |
| P264(CD)  |  |             | 3' hydroxyl |             | 3' hydroxyl |
| P264'(CD) |  |             |             |             | 3' hydroxyl |
